# Supplementary material
Source: ML conference proceedings conference paper supplement (https://www.ecva.net/papers/eccv_2022/papers_ECCV/html/136970054_ECCV_2022_paper.php)
Supplement: Supplementary file 1 [file 136970054-supp.pdf]

## 1 Supplementary material

### 1.1 Crafted instructions

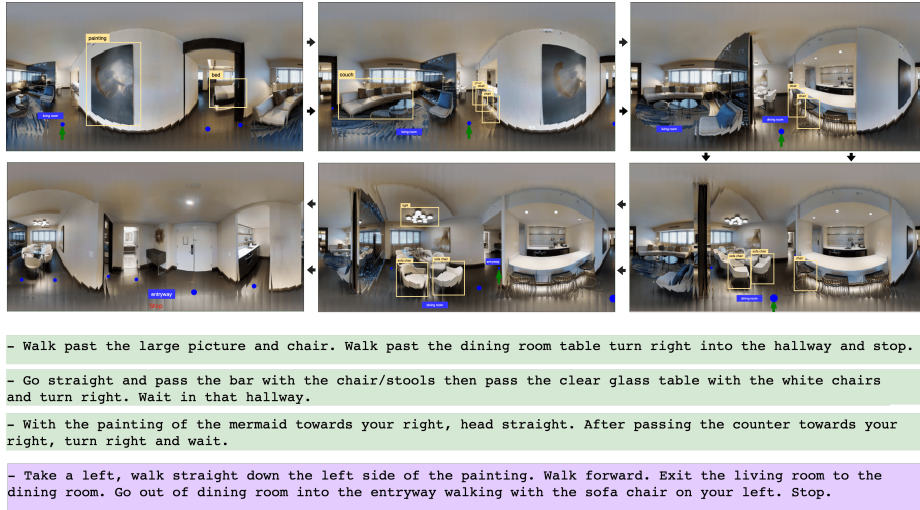

**Fig. 1.** First crafted instructions example. Panoramic views sequence above and **human instructions** + **crafted instruction** below. Images are sequenced through the arrows.

### 1.2 Baseline module with auxiliary tasks

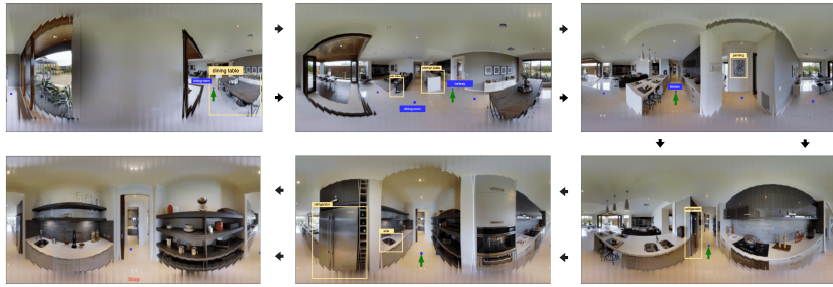

- Walk passed the dining table and continue towards the kitchen. Walk through the kitchen passed the counters and stove and stop near the sink.

- Move to the far left corner of the table. Proceed to the doorway to your right. walk into the kitchen with the stove on your right. proceed forward until the fridge is on your left proceed forward once more until there is a small sink on your left and shelves on your right.

- Walk straight past the table and turn right to go between the kitchen counters and walk straight past the refrigerator into the pantry and stop halfway between the two shelves on the right.

- Make a right, walk straight down the left side of the dining table. exit the dining room to the hallway walking by the left side of the side table. exit the hallway to the kitchen. walk straight down the right side of the refrigerator. go straight with the sink on your left. wait at the right of the faucet

**Fig. 2.** Second crafted instructions example. Panoramic views sequence above and human instructions + crafted instruction below. Images are sequenced through the arrows.

### 1.3 Graphs on training

**Fast adaption of the pre-trained agent:** Figure 6 contains the pre-training with data augmentation and then finetuning starting at the best checkpoint of the pre-training. Almost five epochs are required to increase the success rate by 7% - 8%. These few epochs allow the agent to adapt to human syntax and increase the success rate.

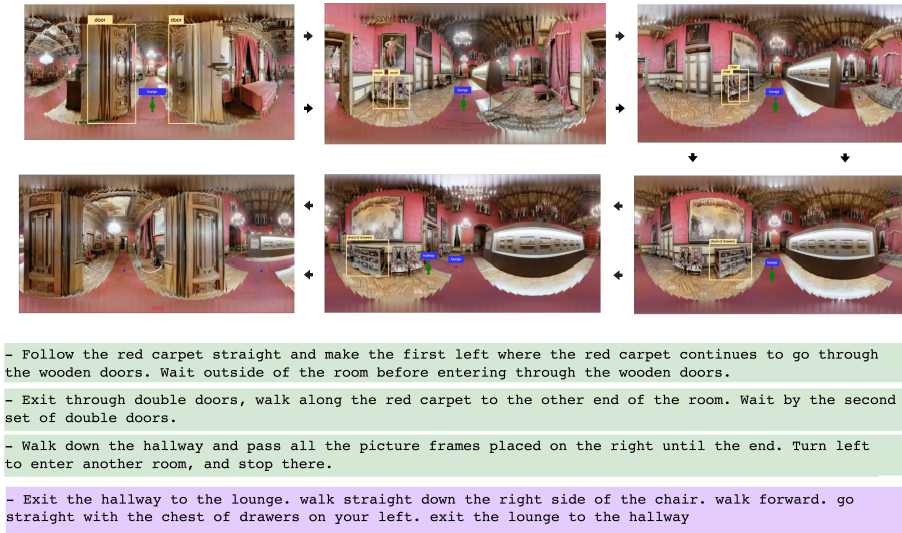

**Fig. 3.** Third crafted instructions example. Panoramic views sequence above and **human instructions** + **crafted instruction** below. Images are sequenced through the arrows.

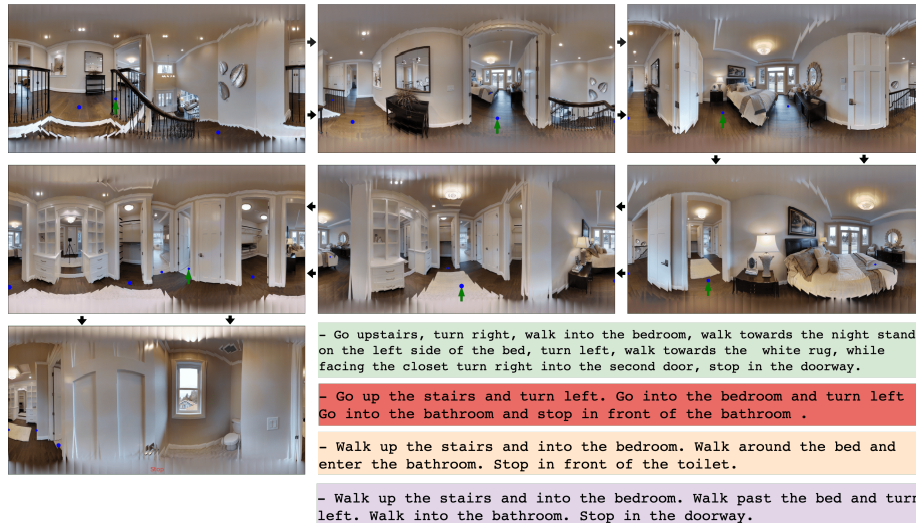

**Fig. 4.** First baseline module with auxiliary tasks output example. Panoramic views sequence above and **human instruction** + **speaker follower instructions** + **speaker follower with objects auxiliary task** + **speaker follower with crafted instructions auxiliary task** below. Images are sequenced through the arrows.

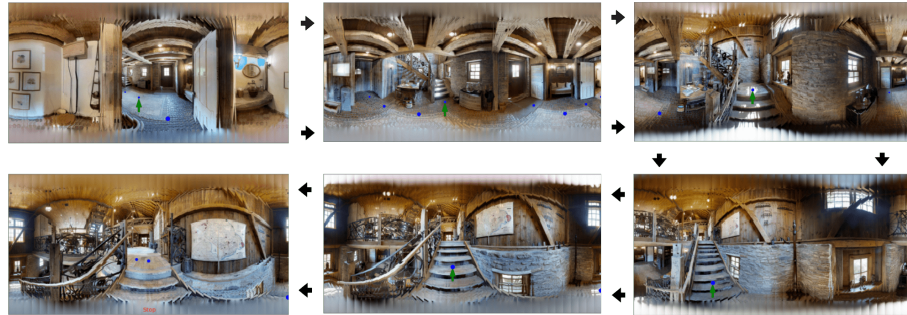

- Walk forward and stop at the doormat in front of the door. Turn left and continue walking. Stop at the bottom of the stairs. Walk to the top of the stairs. Then turn left and walk up the stairs. Stop walking when you're halfway up the stairs.

- Walk straight and turn left. Walk up the stairs. Stop on the second step from the top.

- Walk through the open door and then turn left. Walk up the stairs . stop on the landing at the end of the next set of stairs.

- Walk past the bathroom and turn left. Walk up the stairs. Stop on the second step from the top.

**Fig. 5.** Second baseline module with auxiliary tasks output example. Panoramic views sequence above and **human instruction** + **speaker follower instructions** + **speaker follower with objects auxiliary task** + **speaker follower with crafted instructions auxiliary task** below. Images are sequenced through the arrows.

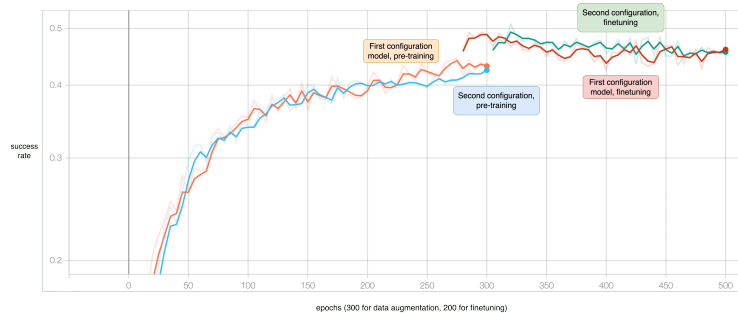

**Fig. 6.** Success rate on validation unseen for two different configurations. Leftmost curves (blue & orange) represent training with data augmentation (Phase I) and rightmost curves (red & green) represent fine-tuning with original training data (Phase II).
